# Supplementary material
Source: PubMed Central journal article supplement (PMC7553231)

# Sampling and refinement protocols for template-based macrocycle docking: 2018 D3R Grand Challenge 4: Supplementary Material

Sergei Kotelnikov<sup>1,2,3,\*</sup> and Andrey Alekseenko<sup>1,2,\*</sup>, Cong Liu<sup>1,4</sup>, Mikhail Ignatov<sup>1,2,5</sup>, Dzmitry Padhorny<sup>1,2</sup>, Emiliano Brini<sup>1</sup>, Mark Lukin<sup>6</sup>, Evangelos Coutsias<sup>1,2</sup>, Ken A. Dill<sup>1,4,7</sup>, Dima Kozakov<sup>1,2,5</sup>

1 Laufer Center for Physical and Quantitative Biology, Stony Brook University, Stony Brook, NY, USA

2 Department of Applied Mathematics and Statistics, Stony Brook University, Stony Brook, NY, USA

3 Innopolis University, Innopolis, Russia

4 Department of Chemistry, Stony Brook University, Stony Brook, NY, USA

5 Institute for Advanced Computational Sciences, Stony Brook University, Stony Brook, NY, USA

6 Department of Pharmacological Sciences, Stony Brook University, Stony Brook, NY, USA

7 Department of Physics and Astronomy, Stony Brook University, Stony Brook, NY, USA

\* These authors contributed equally to this work

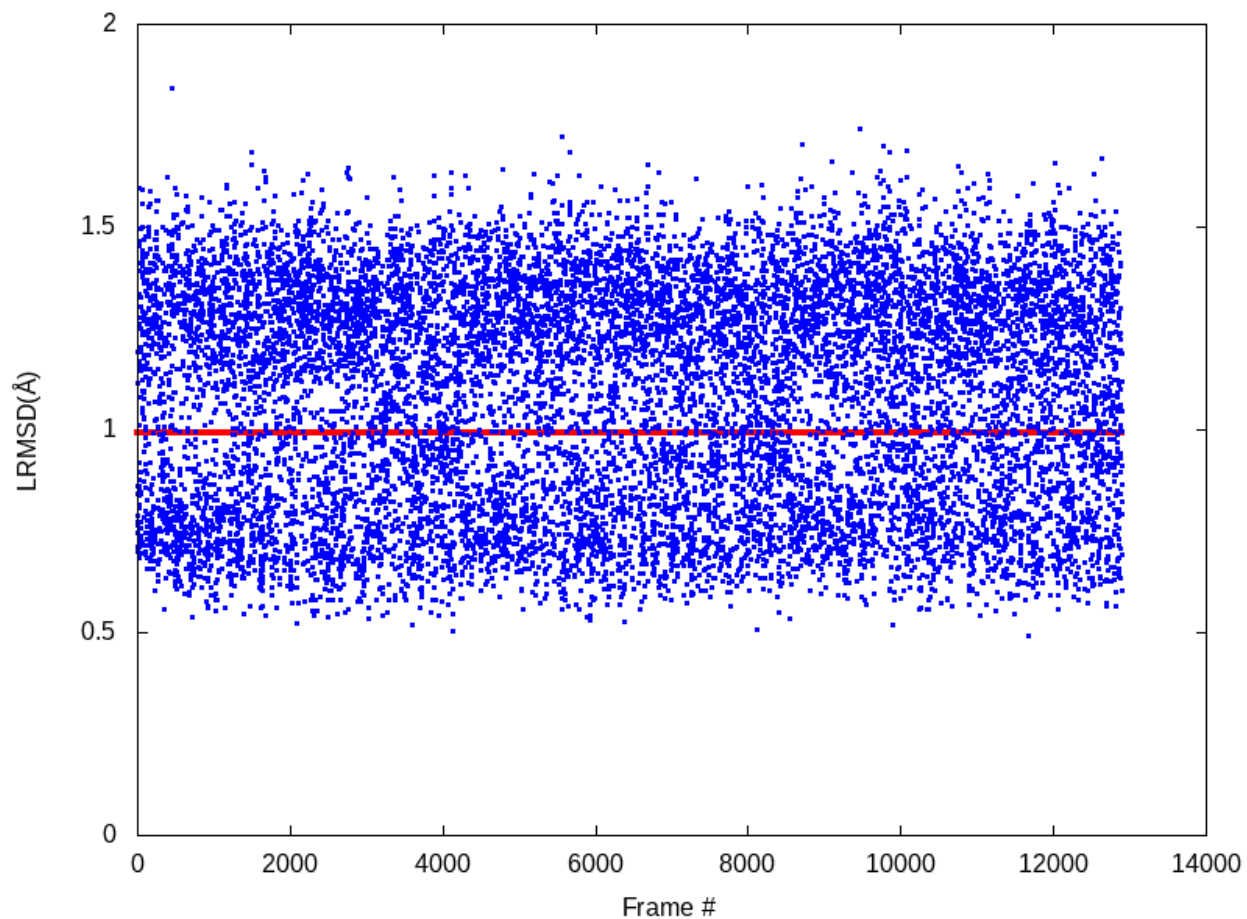

**Fig. S1.** LRMDS of MELD trajectory for BACE\_18. The LRMDS of all poses sampled during MELD simulation and the final best MELD refined pose are depicted as blue dots and a red line, respectively. MELD samples poses closer to native, but the current clustering protocol fails to extract them

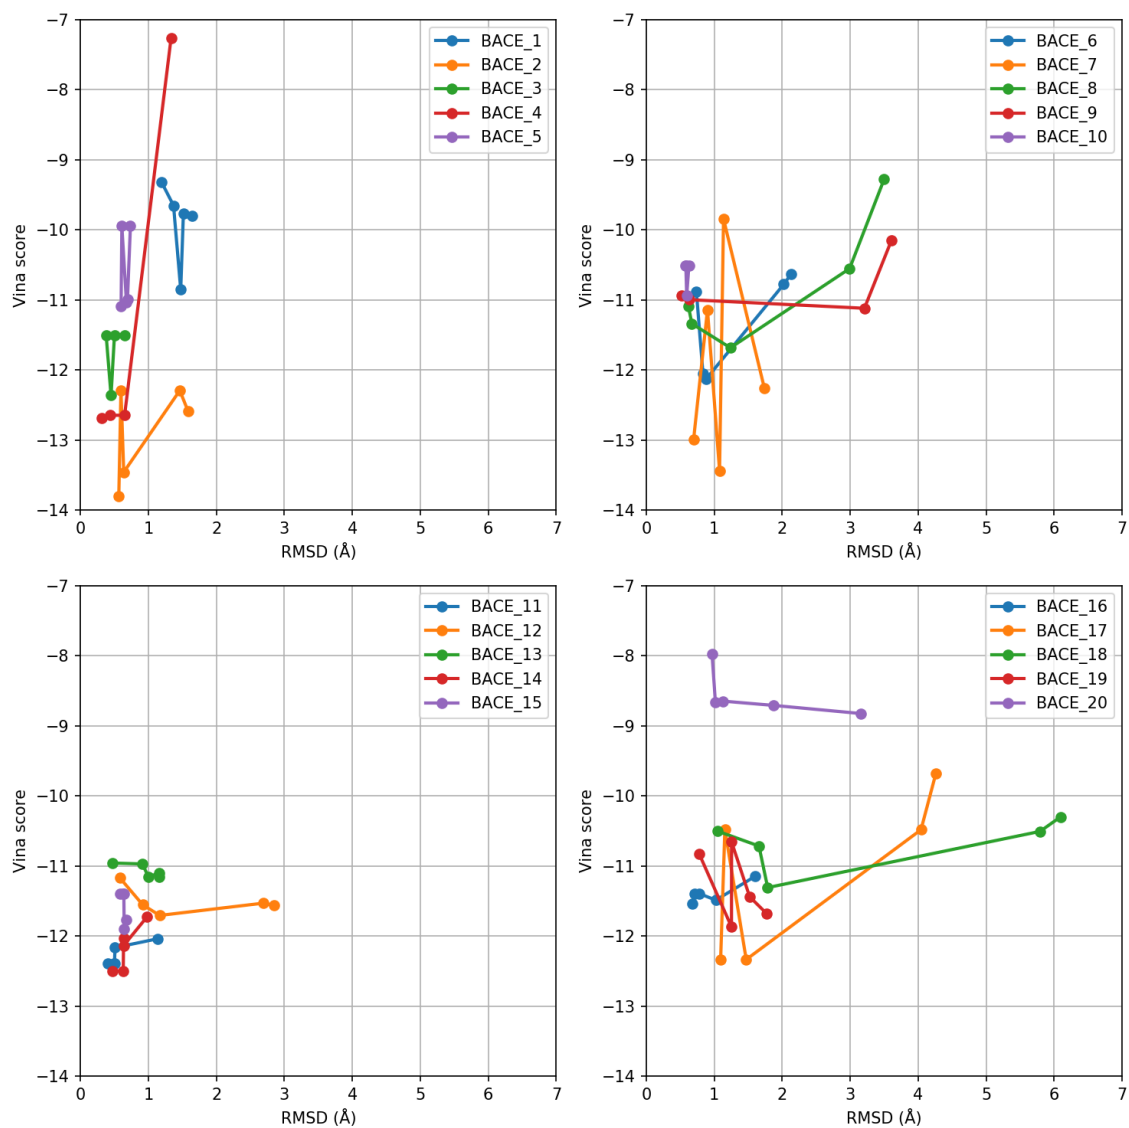

Supplement: NIHMS1547569-supplement-10822_2019_257_MOESM1_ESM.pdf [file NIHMS1547569-supplement-10822_2019_257_MOESM1_ESM.pdf]
